# Supplementary material
Source: PubMed Central journal article supplement (PMC5730478)
Supplement: NIHMS917335-supplement.pdf [file NIHMS917335-supplement.pdf]

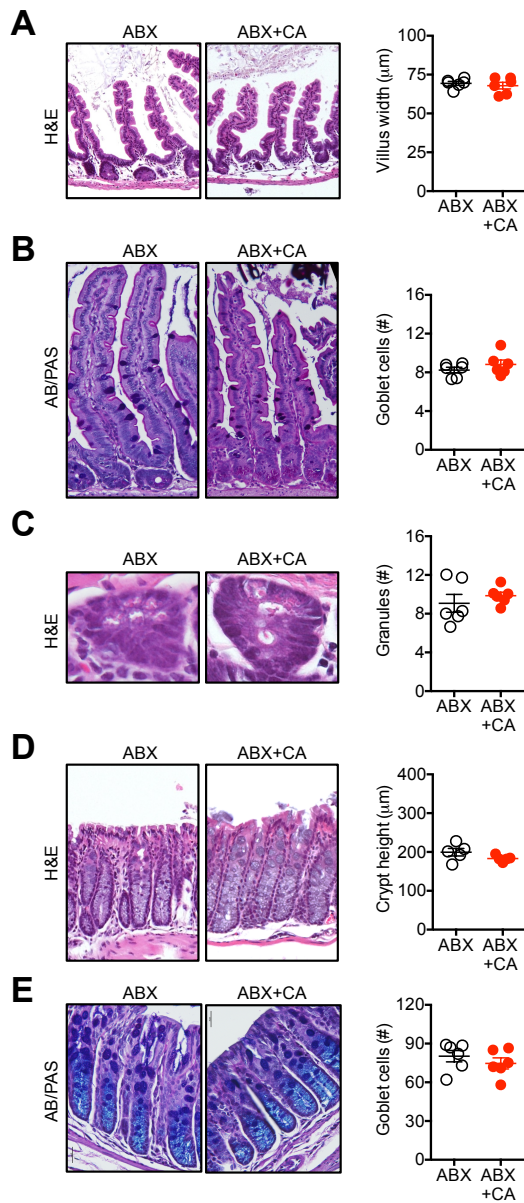

**Figure S1 (related to Figure 1). *C. albicans* enteric colonization does not cause intestinal tissue injury** (A-C) Representative sections of small intestine stained with hematoxylin and eosin (H&E) or alcian blue/periodic acid-Schiff (AB/PAS), and composite data enumerating villus width (A), goblet cells per villus (B), and granules per paneth cell (C), for specific-pathogen free mice administered *C. albicans* and maintained on antibiotics containing ampicillin, gentamicin, metronidazole, neomycin, vancomycin for 14 days (ABX+CA), compared with antibiotic treated controls without *C. albicans* inoculation (ABX). (D,E) Representative sections of colon stained with H&E or AB/PAS, and composite data enumerating crypt height (D), and number of goblet cells per 40X field (E) for mice described in panels (A-C). Data are representative of at least two independent experiments. Bars, mean  $\pm$  s.e.m. Original magnification 10X for (A,D), 20X for (B), or 40X for (C,E).

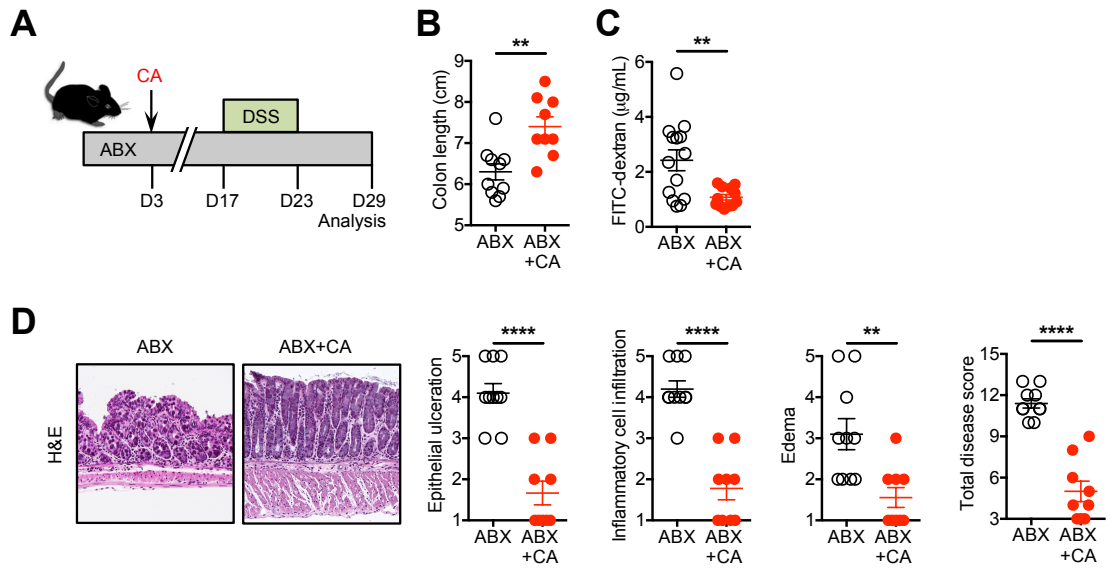

**Figure S2 (related to Figure 1). *C. albicans* intestinal mono-colonization mitigates the severity of DSS induced colitis**

(A) Analysis after 3% DSS initiation among specific-pathogen free mice after supplementing the drinking water with an antibiotic cocktail (ABX) containing ampicillin, gentamicin, metronidazole, neomycin, vancomycin, or administered *C. albicans* (CA) three days after ABX initiation (ABX+CA).

(B-D) Colon length (B), serum FITC-dextran concentration four hours after oral gavage (C), representative hematoxylin and eosin (H&E) stained colonic sections and composite histological scoring (see Methods) (D) after DSS administration (for six days) for mice described in panel (A).

\*\* $P < 0.01$ , \*\*\*\* $P < 0.0001$ , by unpaired t-test with Welch's correction. Data are representative of at least three independent experiments. Bars, mean  $\pm$  s.e.m. Original magnification 10X for (D).

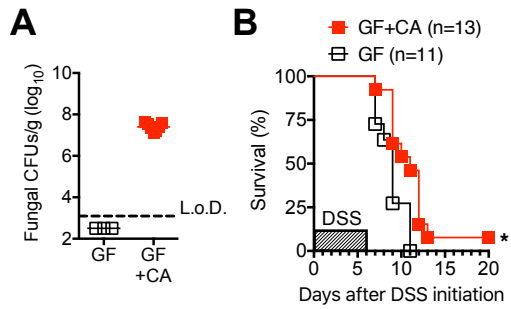

**Figure S3 (related to Figure 1). Overt susceptibility to DSS induced mortality among germ-free mice is improved following *C. albicans* intestinal mono-colonization**

(A) Recoverable fungal CFUs in the feces for germ-free mice 10 days after inoculation with *C. albicans* (GF+CA), compared to germ-free controls without CA administration (GF).

(B) Percent survival after DSS supplementation in the drinking water (for six days) for mice described in panel (A).

\* $P < 0.05$ , by Log-rank (Mantel-Cox) test. Bars, mean  $\pm$  s.e.m. L.o.D., limit of detection.

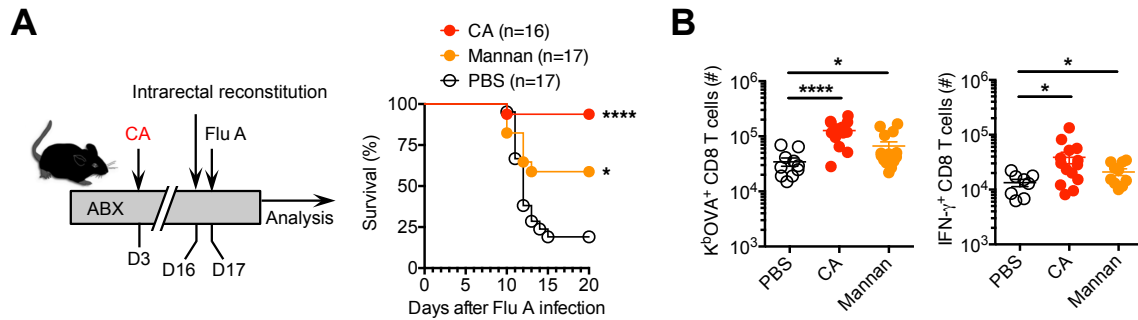

**Figure S4 (related to Figure 4). Mannan stimulation recapitulates the extra-intestinal benefits of persistent *C. albicans* mono-colonization**

(A) Percent survival after influenza A PR8-OVA (Flu A) intranasal infection ( $6 \times 10^4$  PFUs) among specific-pathogen free mice maintained on drinking water supplemented with an antibiotic cocktail (ABX) containing ampicillin, gentamicin, metronidazole, neomycin, vancomycin, and administered *C. albicans* (CA) three days after initiating antibiotic treatment, or intrarectally administered 10 mg mannan or saline (PBS) every other day starting one day prior to infection.

(B) Total number of Flu A-specific  $K^b$ OVA tetramer<sup>+</sup> CD8 T cells (left), and IFN- $\gamma$ <sup>+</sup> CD8 T cells after *in vitro* OVA<sub>257-264</sub> peptide stimulation (right), from lungs nine days after Flu A infection for mice described in panel (A). \* $P < 0.05$ , \*\*\*\* $P < 0.0001$ , by Log-rank (Mantel-Cox) test (A) or by Mann Whitney U test (B). Data are representative of at least three independent experiments. Bars, mean  $\pm$  s.e.m.

**Table S1 (related to STAR METHODS). Antibodies used and staining conditions for flow cytometry**

| Protein       | Fluorophore | Clone   | Vendor      | Dilution |
|---------------|-------------|---------|-------------|----------|
| CD4           | FITC        | GK1.5   | eBioscience | 1:200    |
| CD8 $\alpha$  | APC         | 53-6.7  | eBioscience | 1:200    |
| CD11b         | PE-Cy5      | M1/70   | eBioscience | 1:200    |
| CD11c         | PE-Cy5      | N418    | eBioscience | 1:200    |
| F4/80         | PE-Cy5      | BM8     | eBioscience | 1:200    |
| B220          | PE-Cy5      | RA3-6B2 | eBioscience | 1:200    |
| IFN- $\gamma$ | eFluor 450  | XMG1.2  | eBioscience | 1:100    |
